# Supplementary material for: Flavanol Glycoside Content of Grape Seeds and Skins of Vitis vinifera Varieties Grown in Castilla-La Mancha, Spain
Source: PubMed Central journal article supplement (PMC6864760; doi:10.3390/molecules24214001), 2019-11-05
Supplement: molecules-24-04001-s001.pdf [file molecules-24-04001-s001.pdf]

**Table S1.** MS/MS chromatographic retention time (RT) and transitions of flavanol glycosides identified in *V. vinifera* grape skins and seeds.

| Peak | Compound                            | RT (min) | Transition m/z  |
|------|-------------------------------------|----------|-----------------|
| 1    | (Epi)catechin monoglycoside         | 38.4     | 451.10 > 341.10 |
| 2    | (Epi)catechin monoglycoside         | 40.5     | 451.10 > 341.10 |
| 3    | (Epi)catechin monoglycoside         | 48.5     | 451.10 > 341.10 |
| 4    | (Epi)catechin monoglycoside         | 49.8     | 451.10 > 341.10 |
| 5    | (Epi)catechin monoglycoside         | 50.4     | 451.10 > 341.10 |
| 6    | (Epi)catechin monoglycoside         | 51.7     | 451.10 > 341.10 |
| 7    | (Epi)catechin monoglycoside         | 53.1     | 451.10 > 341.10 |
| 8    | (Epi)catechin monoglycoside         | 53.7     | 451.10 > 341.10 |
| 9    | (Epi)catechin monoglycoside         | 55.8     | 451.10 > 341.10 |
| 10   | (Epi)catechin monoglycoside         | 58.4     | 451.10 > 341.10 |
| 11   | (Epi)catechin monoglycoside         | 60.1     | 451.10 > 341.10 |
| 12   | (Epi)gallo catechin monoglycoside   | 19.4     | 467.10 > 305.20 |
| 13   | (Epi)gallo catechin monoglycoside   | 21.2     | 467.10 > 305.20 |
| 14   | (Epi)gallo catechin monoglycoside   | 22.4     | 467.10 > 305.20 |
| 15   | (Epi)gallo catechin monoglycoside   | 23.2     | 467.10 > 305.20 |
| 16   | (Epi)gallo catechin monoglycoside   | 45.9     | 467.10 > 305.20 |
| 17   | (Epi)gallo catechin monoglycoside   | 59.4     | 467.10 > 305.20 |
| 18   | (Epi)catechin gallate monoglycoside | 39.8     | 603.20 > 169.10 |
| 19   | (Epi)catechin gallate monoglycoside | 45.7     | 603.20 > 169.10 |
| 20   | (Epi)catechin gallate monoglycoside | 60.0     | 603.20 > 169.10 |
| 21   | (Epi)catechin diglycoside           | 20.7     | 613.10 > 577.10 |
| 22   | (Epi)catechin diglycoside           | 25.4     | 613.10 > 577.10 |
| 23   | (Epi)catechin diglycoside           | 30.1     | 613.10 > 577.10 |
| 24   | (Epi)catechin diglycoside           | 46.7     | 613.10 > 577.10 |
| 25   | (Epi)catechin dimer monoglycoside   | 24.8     | 739.20 > 289.10 |
| 26   | (Epi)catechin dimer monoglycoside   | 27.6     | 739.20 > 289.10 |
| 27   | (Epi)catechin dimer monoglycoside   | 31.2     | 739.20 > 289.10 |

**Table S2.** Calibration data of (+)-catechin-4'-O- $\beta$ -glucoside standard used for the MS/MS quantification of flavanol glycosides in *Vitis vinifera* grape skins and seeds.

| Compound                              | RT (min) | Transition m/z  | Linear range (mg/L) | Linear curve                  | R <sup>2</sup> | LOD (mg/L) | LOQ (mg/L) |
|---------------------------------------|----------|-----------------|---------------------|-------------------------------|----------------|------------|------------|
| (+)-Catechin-4'-O- $\beta$ -glucoside | 20.8     | 451.10 > 289.10 | 0.01 - 5            | $y = 23608951.71x + 46060.94$ | 0.9997         | 0.022      | 0.074      |
